# Supplementary material for: Prognostic factors for the long term outcome after surgical celiac artery decompression in MALS
Source: Springer Nature journal article supplement (doi:10.1186/s13023-023-02952-7), 2023-10-23
Supplement: MOESM1 [file 26213916]

| PATIENT # | Persistent symptoms | Minimal diameter of celiac artery (mm) in CTA | Preoperative Expiratory Vmax (cm/s) | Postoperative Expiratory Vmax (cm/s) |
|-----------|---------------------|-----------------------------------------------|-------------------------------------|--------------------------------------|
| 1         | Yes                 | 3.0                                           | 349                                 | 191                                  |
| 3         | Yes                 | 2.9                                           | 357                                 | 197                                  |
| 4         | Yes                 | 4.3                                           | 189                                 | 102                                  |
| 6         | Yes                 | 1.5                                           | 520                                 | 270                                  |
| 11        | Yes                 | 3.4                                           | 342                                 | 207                                  |
| 12        | Yes                 | 3.3                                           | 285                                 | 178                                  |
| 15        | Yes                 | 1.9                                           | 508                                 | 287                                  |
| 18        | Yes                 | 4.1                                           | 158                                 | 126                                  |
| 2         | No                  | 3.1                                           | 259                                 | 164                                  |
| 5         | No                  | 2.8                                           | 327                                 | 200                                  |
| 7         | No                  | 4.1                                           | 169                                 | 108                                  |
| 8         | No                  | 3.5                                           | 266                                 | 194                                  |
| 9         | No                  | 1.6                                           | 460                                 | 307                                  |
| 10        | No                  | 4.3                                           | 289                                 | 155                                  |
| 13        | No                  | 1.1                                           | 575                                 |                                      |
| 14        | No                  | 3.4                                           | 272                                 | 187                                  |
| 16        | No                  | 2.7                                           | 421                                 | 183                                  |
| 17        | No                  | 3.0                                           | 476                                 | 348                                  |
| 19        | No                  | 1.9                                           | 267                                 | 179                                  |
| 20        | No                  | 4.4                                           | 228                                 | 145                                  |

**Supplemental Table S1.** Imaging findings in CTA and DUS
