# Supplementary material for: Prognostic factors for the long term outcome after surgical celiac artery decompression in MALS
Source: Springer Nature journal article supplement (doi:10.1186/s13023-023-02952-7), 2023-10-23
Supplement: MOESM2 [file 26213916]

| Reference          | Number of patients | Mean follow-up duration (month) | Improvement of symptoms n (%) |
|--------------------|--------------------|---------------------------------|-------------------------------|
| Columbo, 2015      | 21                 | 7                               | 18(81)                        |
| Fernstrum, 2020    | 27                 | 30                              | 17 (68)                       |
| Ho, 2017           | 43                 | 25                              | 16 (37)                       |
| Khrucharoen, 2020  | 41                 | 16                              | 18 (44)                       |
| Pather, 2021       | 46                 | 96                              | 30 (65)                       |
| Van Petersen, 2009 | 42                 | 20                              | 41 (98)                       |
| Weber, 2016        | 31                 | 52                              | 20 (64)                       |

|                   |    |     |          |
|-------------------|----|-----|----------|
| Baccari, 2009     | 16 | 28  | 16 (100) |
| Baldassarre, 2007 | 1  | 3   | 1 (100)  |
| Berard, 2012      | 11 | 35  | 8 (73)   |
| Berge, 2020       | 12 | 18  | 7 (58)   |
| Carbonell, 2005   | 1  | 7   | 1 (100)  |
| Cienfuegos, 2017  | 13 | 117 | 9 (69)   |
| DeAth, 2018       | 6  | 109 | 6 (100)  |
| Do, 2013          | 12 | 22  | 8 (67)   |
| Dordoni, 2002     | 1  | 6   | 1 (100)  |
| Duffy, 2008       | 1  | 10  | 1 (100)  |
| Fajer, 2014       | 1  | 3   | 1 (100)  |
| Gander, 2010      | 1  | 4   | 1 (100)  |
| Grus T, 2018      | 8  | 12  | 8 (100)  |
| Jaik, 2008        | 1  | 6   | 1 (100)  |
| Jarry, 2008       | 1  | 1   | 1 (100)  |
| Joyce, 2013       | 6  | 13  | 6 (100)  |
| Kafadar, 2021     | 10 | 6   | 10 (100) |
| Kohn, 2011        | 6  | 49  | 5 (83)   |
| Lainez, 2013      | 1  | 0.5 | 1 (100)  |
| Marable, 1968     | 17 | 0   | 13 (76)  |
| Mihas, 1977       | 4  | 0   | 0 (0)    |
| Muqeatadnan, 2013 | 1  | 0   | 1 (100)  |
| Nguyen, 2012      | 5  | 20  | 5 (100)  |
| Reddy, 2019       | 3  | 15  | 3 (100)  |
| Relles, 2012      | 3  | 11  | 2 (67)   |
| Roayaie, 2002     | 1  | 3   | 1 (100)  |
| Rogers, 1982      | 7  | 58  | 2 (29)   |
| Roseborough, 2009 | 15 | 44  | 14 (93)  |
| Rotellar, 2009    | 7  | 6   | 3 (43)   |
| Sahm, 2020        | 16 | 5   | 14 (87)  |
| Sultan, 2013      | 11 | 60  | 8 (73)   |
| Thoolen, 2015     | 9  | 6   | 4 (44)   |
| Tulloch, 2010     | 14 | 14  | 8 (57)   |
| Tsujimoto, 2012   | 1  | 0   | 1 (100)  |
| Vaziri, 2009      | 3  | 6   | 3 (100)  |
| Watson, 1977      | 18 | 30  | 14 (78)  |
| Wani, 2012        | 2  | 2   | 2 (100)  |
| You, 2013         | 1  | 0.5 | 1 (100)  |

**Supplemental Table S2.** Studies on the surgical outcome of celiac artery decompression in median arcuate ligament syndrome (MALS), with patient size of more and less than 20 patients.
